# Supplementary material
Source: publisher figshare collection journal article supplement (https://gsajournals.figshare.com/ndownloader/files/18022739)
Supplement: Supplementary file 1 [file 18022739]

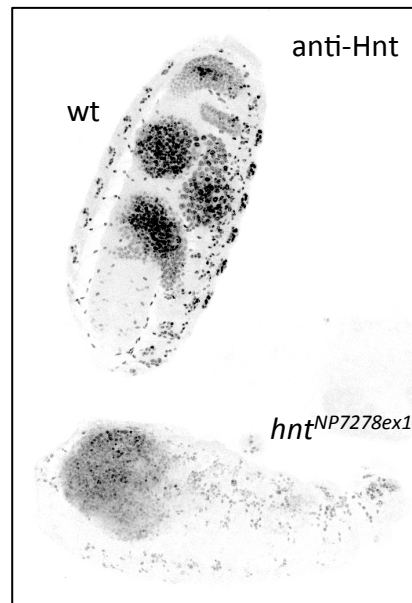

**Figure S2. Anti-Hnt immunostaining in *hnt*<sup>NP7278ex1</sup> mutants is reduced compared to wildtype.**

A representative confocal micrograph of two similarly staged embryos imaged within a single frame (upper wildtype; lower *hnt*<sup>NP7278ex1</sup>). Image processing by conversion to grayscale and color inversion shows reduced (faint) anti-Hnt signal in *hnt*<sup>NP7278ex1</sup> mutant embryos relative to wildtype (darker).
